# Supplementary material
Source: PubMed Central journal article supplement (PMC3698683)
Supplement: Supp_Data.pdf [file Supp_Data.pdf]

## Supplementary Data

SUPPLEMENTARY TABLE S1. MULTIVARIATE COX PROPORTIONAL HAZARDS MAIN EFFECTS AND INTERACTIONS MODEL:  
ATV/r TREATMENT DISCONTINUATION AND TIME TO VIROLOGIC FAILURE

| Covariate <sup>a</sup>                                          | Hazard ratio <sup>b</sup> | 95% CI         | p-value |
|-----------------------------------------------------------------|---------------------------|----------------|---------|
| <b>ATV/r treatment discontinuation</b>                          |                           |                |         |
| Gender: females vs. males                                       | 1.52                      | 1.25, 1.82     | <0.001  |
| Baseline detectable viremia, <sup>c</sup> yes vs. no            | 1.29                      | 1.04, 1.61     | 0.022   |
| Germany vs. France                                              | 1.12                      | 0.91, 1.40     | 0.288   |
| Sweden vs. France                                               | 1.63                      | 1.27, 2.08     | <0.001  |
| Protease inhibitors vs. no protease inhibitors <sup>c</sup>     | 4.92                      | 3.77, 6.42     | <0.001  |
| NRT inhibitors vs. no NRT inhibitors <sup>c</sup>               | 1.56                      | 1.14, 2.13     | 0.006   |
| Non-NRT inhibitors vs. no non-NRT inhibitors <sup>c</sup>       | 3.23                      | 2.27, 4.58     | <0.001  |
| Other antiretrovirals vs. no other antiretrovirals <sup>c</sup> | 31.34                     | 7.62, 128.86   | <0.001  |
| Baseline detectable viremia <sup>c</sup> ×protease inhibitors   | 0.60                      | 0.42, 0.85     | 0.004   |
| Baseline detectable viremia <sup>c</sup> ×other antivirals      | 0.05                      | 0.01, 0.25     | <0.001  |
| Protease inhibitors×non-NRT inhibitors                          | 0.38                      | 0.22, 0.64     | <0.001  |
| Non-NRT inhibitors×Germany                                      | 1.44                      | 0.86, 2.40     | 0.163   |
| Non-NRT inhibitors×Sweden                                       | 0.45                      | 0.23, 0.90     | 0.024   |
| <b>Time to virologic failure</b>                                |                           |                |         |
| Gender: females vs. males                                       | 1.04                      | 0.83, 1.30     | .743    |
| Baseline detectable viremia, <sup>c</sup> yes vs. no            | 3.74                      | 2.91, 4.81     | <0.001  |
| Germany vs. France                                              | 1.04                      | 0.82, 1.32     | 0.745   |
| Sweden vs. France                                               | 1.93                      | 1.45, 2.56     | <0.001  |
| Protease inhibitors vs. no protease inhibitors <sup>c</sup>     | 2.73                      | 1.84, 4.04     | <0.001  |
| NRT inhibitors vs. no NRT inhibitors <sup>c</sup>               | 2.12                      | 1.36, 3.33     | 0.001   |
| Non-NRT inhibitors vs. no non-NRT inhibitors <sup>c</sup>       | 2.17                      | 1.34, 3.51     | 0.002   |
| Other antivirals relative to no other antivirals                | 0.00                      | 0.00, 1.7E165  | 0.967   |
| Baseline detectable viremia <sup>c</sup> ×protease inhibitors   | 0.60                      | 0.38, 0.95     | 0.031   |
| Baseline detectable viremia <sup>c</sup> ×other antivirals      | 7807.32                   | 0.00, 5.34E172 | 0.964   |
| Protease inhibitors×non-NRT inhibitors                          | 0.96                      | 0.47, 1.97     | 0.914   |
| Non-NRT inhibitors×Germany                                      | 0.59                      | 0.27, 1.30     | 0.191   |
| Non-NRT inhibitors×Sweden                                       | 0.37                      | 0.15, 0.91     | 0.031   |

<sup>a</sup>Number (%) of patients used in the model, 1262 (98%).

<sup>b</sup>Covariate adjusted hazard ratio of time to discontinuation or virologic failure. Defined as  $\geq 500$  copies/ml. Only significant variables ( $p$ -value  $< 0.05$ ) were included with the exception of gender and detectable viremia, which were known to be significant and so have been forced into the model. The model was rerun with only those variables kept in the final model using backward elimination, thus maximizing the number of patients used in the analysis.

<sup>c</sup>Use as the last concomitant therapy (that is the last drug class recorded in combination with ATV/r before discontinuation).  
CI, confidence interval; NRT, nucleoside reverse transcriptase.
